# Supplementary material
Source: publisher site journal article supplement (https://www.dovepress.com/article/596275)
Supplement: Supplementary file 1 [file 596275%20Revised%20Supplementary%20Material.docx]

**Supplementary Table legends**

**Table S1**. Publication and Citation Profiles of Leading Countries.

**Table S2**. Bibliometric Indicators of High-Impact Journals.

**Table S3.** Publication and Citation Profiles of High-Impact Authors.

**Table S4.** List of 50 most cited articles.

**Table S5**. Keyword Clusters in Autoimmune Gastritis and *H. pylori* Research.

**Table S1 Publication and Citation Profiles of Leading Countries**

| **Country** | **Articles** | **Freq** | **SCP** | **MCP** | **MCP_Ratio** | **TP** | **TP_rank** | **TC** | **TC_rank** | **Average Citations** |
| --- | --- | --- | --- | --- | --- | --- | --- | --- | --- | --- |
| ITALY | 75 | 0.194 | 58 | 17 | 0.227 | 344 | 1 | 2632 | 1 | 35.1 |
| USA | 56 | 0.145 | 50 | 6 | 0.107 | 188 | 2 | 1951 | 2 | 34.8 |
| JAPAN | 43 | 0.111 | 41 | 2 | 0.047 | 168 | 3 | 702 | 4 | 16.3 |
| GERMANY | 32 | 0.083 | 24 | 8 | 0.250 | 104 | 4 | 1533 | 3 | 47.9 |
| CHINA | 14 | 0.036 | 13 | 1 | 0.071 | 54 | 6 | 175 | 13 | 12.5 |
| UNITED KINGDOM | 14 | 0.036 | 11 | 3 | 0.214 | 53 | 7 | 543 | 6 | 38.8 |
| TURKEY | 13 | 0.034 | 11 | 2 | 0.154 | 29 | 11 | 169 | 15 | 13 |
| ISRAEL | 12 | 0.031 | 8 | 4 | 0.333 | 49 | 9 | 509 | 7 | 42.4 |
| FINLAND | 11 | 0.028 | 8 | 3 | 0.273 | 51 | 8 | 410 | 9 | 37.3 |
| SWEDEN | 10 | 0.026 | 7 | 3 | 0.300 | 41 | 10 | 398 | 10 | 39.8 |
| SWITZERLAND | 10 | 0.026 | 9 | 1 | 0.100 | 27 | 13 | 590 | 5 | 59 |
| AUSTRALIA | 9 | 0.023 | 7 | 2 | 0.222 | 28 | 12 | 170 | 14 | 18.9 |
| FRANCE | 6 | 0.016 | 2 | 4 | 0.667 | 64 | 5 | 238 | 11 | 39.7 |
| GREECE | 5 | 0.013 | 3 | 2 | 0.400 | 15 | 20 | 227 | 12 | 45.4 |
| POLAND | 5 | 0.013 | 3 | 2 | 0.400 | 14 | 22 | 50 | 21 | 10 |
| PORTUGAL | 5 | 0.013 | 5 | 0 | 0.000 | 20 | 16 | 45 | 23 | 9 |
| AUSTRIA | 4 | 0.010 | 3 | 1 | 0.250 | 19 | 17 | 59 | 19 | 14.8 |
| BRAZIL | 4 | 0.010 | 4 | 0 | 0.000 | 18 | 19 | 57 | 20 | 14.2 |
| CANADA | 4 | 0.010 | 2 | 2 | 0.500 | 13 | 23 | 49 | 22 | 12.2 |
| KOREA | 4 | 0.010 | 4 | 0 | 0.000 | 13 | 25 | 80 | 17 | 20 |

**Table S2 Bibliometric Indicators of High-Impact Journals**

| **Journal** | **H_index** | **IF** | **JCR_Quartile** | **PY_start** | **TP** | **TP_rank** | **TC** | **TC_rank** |
| --- | --- | --- | --- | --- | --- | --- | --- | --- |
| WORLD JOURNAL OF GASTROENTEROLOGY | 11 | 4.3 | Q1 | 2005 | 14 | 1 | 284 | 8 |
| AMERICAN JOURNAL OF SURGICAL PATHOLOGY | 10 | 4.5 | Q1 | 2001 | 10 | 3 | 331 | 5 |
| SCANDINAVIAN JOURNAL OF GASTROENTEROLOGY | 10 | 1.6 | Q3 | 1991 | 13 | 2 | 498 | 3 |
| DIGESTIVE AND LIVER DISEASE | 7 | 4 | Q1 | 2000 | 8 | 8 | 141 | 17 |
| EUROPEAN JOURNAL OF GASTROENTEROLOGY & HEPATOLOGY | 7 | 2.3 | Q3 | 1993 | 9 | 5 | 128 | 19 |
| GASTROENTEROLOGY | 7 | 25.7 | Q1 | 1996 | 9 | 6 | 900 | 1 |
| HELICOBACTER | 7 | 4.3 | Q2 | 1997 | 10 | 4 | 311 | 6 |
| JOURNAL OF CLINICAL PATHOLOGY | 7 | 2.5 | Q2 | 1991 | 7 | 11 | 196 | 13 |
| AMERICAN JOURNAL OF GASTROENTEROLOGY | 6 | 8 | Q1 | 1991 | 8 | 7 | 361 | 4 |
| DIGESTIVE DISEASES AND SCIENCES | 6 | 2.5 | Q2 | 1999 | 8 | 9 | 184 | 14 |
| CURRENT OPINION IN GASTROENTEROLOGY | 5 | 2.6 | Q2 | 1991 | 7 | 10 | 26 | 90 |
| DIGESTION | 5 | 3 | Q2 | 1995 | 6 | 12 | 98 | 26 |
| INFECTION AND IMMUNITY | 5 | 2.9 | Q2 | 1996 | 5 | 14 | 221 | 12 |
| JOURNAL OF CLINICAL ENDOCRINOLOGY & METABOLISM | 5 | 5 | Q1 | 1999 | 5 | 15 | 117 | 21 |
| ALIMENTARY PHARMACOLOGY & THERAPEUTICS | 4 | 6.6 | Q1 | 2002 | 4 | 19 | 296 | 7 |
| CANCER RESEARCH | 4 | 12.5 | Q1 | 2005 | 4 | 21 | 132 | 18 |
| CELLULAR AND MOLECULAR GASTROENTEROLOGY AND HEPATOLOGY | 4 | 7.1 | Q1 | 2018 | 4 | 22 | 25 | 94 |
| CLINICAL AND TRANSLATIONAL GASTROENTEROLOGY | 4 | 3 | Q2 | 2016 | 4 | 23 | 22 | 103 |
| ENDOCRINE | 4 | 3 | Q2 | 2009 | 4 | 25 | 16 | 139 |
| FRONTIERS IN IMMUNOLOGY | 4 | 5.7 | Q1 | 2014 | 4 | 26 | 18 | 123 |

Note(s): H_index: The h-index of the journal, which measures both the productivity and citation impact of the publications. IF: Impact Factor, indicating the average number of citations to recent articles published in the journal. JCR_Quartile: The quartile ranking of the journal in the Journal Citation Reports, indicating the journal's ranking relative to others in the same field (Q1: top 25%, Q2: 25%-50%, Q3: 50%-75%, Q4: bottom 25%). TP: Total Publications. TP_rank: Rank of Total Publications. TC: Total Citations. TC_rank: Rank of Total Citations. Average Citations: The average number of citations per publication. PY_start: Publication Year Start, indicating the year the journal started publication.

**Table S3 Publication and Citation Profiles of High-Impact Authors**

| **Authors** | **H_index** | **g-index** | **m-index** | **PY_start** | **TP** | **TP_Frac** | **TP_rank** | **TC** | **TC_rank** |
| --- | --- | --- | --- | --- | --- | --- | --- | --- | --- |
| ANNIBALE BRUNO | 10 | 15 | 0.48 | 2005 | 15 | 1.68 | 1 | 507 | 6 |
| LAHNER EDITH | 10 | 15 | 0.48 | 2005 | 15 | 1.67 | 2 | 675 | 2 |
| STOLTE M | 10 | 10 | 0.29 | 1992 | 10 | 2.21 | 4 | 477 | 7 |
| FALLER G | 8 | 9 | 0.27 | 1996 | 9 | 2.13 | 5 | 578 | 4 |
| KIRCHNER T | 7 | 8 | 0.23 | 1996 | 8 | 1.98 | 7 | 553 | 5 |
| VIETH MICHAEL | 7 | 7 | 0.33 | 2005 | 7 | 0.73 | 12 | 167 | 20 |
| CANNIZZARO RENATO | 6 | 11 | 0.50 | 2014 | 11 | 1.04 | 3 | 149 | 25 |
| CHIBA T | 6 | 6 | 0.23 | 2000 | 6 | 0.46 | 13 | 158 | 21 |
| DE RE VALLI | 6 | 8 | 0.50 | 2014 | 8 | 0.86 | 6 | 126 | 32 |
| GENTA ROBERT M. | 6 | 6 | 0.26 | 2003 | 6 | 1.80 | 17 | 366 | 10 |
| HERSHKO CHAIM | 6 | 7 | 0.29 | 2005 | 7 | 2.25 | 10 | 451 | 8 |
| HIAI H | 6 | 6 | 0.23 | 2000 | 6 | 0.46 | 18 | 158 | 21 |
| LENTI MARCO VINCENZO | 6 | 8 | 0.86 | 2019 | 8 | 0.61 | 8 | 330 | 12 |
| MALFERTHEINER PETER | 6 | 6 | 0.29 | 2005 | 6 | 0.78 | 19 | 178 | 19 |
| OKAZAKI K | 6 | 6 | 0.23 | 2000 | 6 | 0.46 | 20 | 158 | 21 |
| PRITCHARD D. MARK | 6 | 6 | 0.40 | 2011 | 6 | 0.65 | 21 | 309 | 13 |
| RUGGE MASSIMO | 6 | 7 | 0.50 | 2014 | 7 | 0.86 | 11 | 412 | 9 |
| APPELMELK BJ | 5 | 5 | 0.17 | 1996 | 5 | 0.63 | 24 | 1009 | 1 |
| CANZONIERI VINCENZO | 5 | 7 | 0.42 | 2014 | 7 | 0.75 | 9 | 117 | 35 |
| DI SABATINO ANTONIO | 5 | 6 | 0.71 | 2019 | 6 | 0.41 | 14 | 154 | 24 |

Note(s): H_index: The h-index of the Author, which measures both the productivity and citation impact of the publications. g_index: The g-index of the journal, which gives more weight to highly-cited articles. m_index: The m-index of the journal, which is the h-index divided by the number of years since the first published paper. TP: Total Publications. TP_rank: Rank of Total Publications. TC: Total Citations. TC_rank: Rank of Total Citations. Average Citations: The average number of citations per publication. PY_start: Publication Year Start, indicating the year the journal started publication.

**Table S4. List of 50 most cited articles.**

| **N** | **Paper** | **DOI** | **Total Citations** | **TC per Year** | **Normalized TC** |
| --- | --- | --- | --- | --- | --- |
| 1 | APPELMELK BJ, 1996, INFECT IMMUN | 10.1128/IAI.64.6.2031-2040.1996 | 366 | 12.20 | 3.82 |
| 2 | OERTLI M, 2012, J CLIN INVEST | 10.1172/JCI61029 | 245 | 17.50 | 5.90 |
| 3 | DANIELS JA, 2007, AM J SURG PATHOL | 10.1097/PAS.0b013e3180cab60c | 240 | 12.63 | 5.69 |
| 4 | RAD R, 2006, GASTROENTEROLOGY | 10.1053/j.gastro.2006.05.001 | 218 | 10.90 | 3.97 |
| 5 | AMEDEI A, 2003, J EXP MED | 10.1084/jem.20030530 | 206 | 8.96 | 3.09 |
| 6 | CLAEYS D, 1998, GASTROENTEROLOGY | 10.1016/S0016-5085(98)70200-8 | 201 | 7.18 | 3.76 |
| 7 | MALAMUT G, 2010, AM J GASTROENTEROL | 10.1038/ajg.2010.214 | 195 | 12.19 | 5.26 |
| 8 | VÄÄNÄNEN H, 2003, EUR J GASTROEN HEPAT | 10.1097/01.meg.0000059169.46867.01 | 185 | 8.04 | 2.78 |
| 9 | HERSHKO C, 2006, BLOOD | 10.1182/blood-2005-09-3534 | 174 | 8.70 | 3.17 |
| 10 | LENTI MV, 2020, NAT REV DIS PRIMERS | 10.1038/s41572-020-0187-8 | 174 | 29 | 8.8 |
| 11 | ANDERSON WF, 2018, JNCI-J NATL CANCER I | 10.1093/jnci/djx262 | 167 | 20.88 | 6.04 |
| 12 | RAGHAVAN S, 2003, CLIN EXP IMMUNOL | 10.1046/j.1365-2249.2003.02177.x | 152 | 6.61 | 2.28 |
| 13 | GREINER A, 1994, LAB INVEST |  | 149 | 4.66 | 2.42 |
| 14 | PARSONS BN, 2017, PLOS PATHOG | 10.1371/journal.ppat.1006653 | 140 | 15.56 | 4.94 |
| 15 | ABRAHAM SC, 2001, AM J SURG PATHOL | 10.1097/00000478-200104000-00010 | 129 | 5.16 | 2.21 |
| 16 | HERSHKO C, 2005, HAEMATOLOGICA |  | 127 | 6.05 | 2.54 |
| 17 | D'ELIOS MM, 2001, GASTROENTEROLOGY | 10.1053/gast.2001.21187 | 123 | 4.92 | 2.1 |
| 18 | LAHNER E, 2009, AM J GASTROENTEROL | 10.1038/ajg.2009.231 | 117 | 6.88 | 4.01 |
| 19 | ROGERS AB, 2005, CANCER RES | 10.1158/0008-5472.CAN-05-1846 | 114 | 5.43 | 2.28 |
| 20 | APPELMELK BJ, 1998, IMMUNOL TODAY | 10.1016/S0167-5699(98)01281-X | 113 | 4.04 | 2.11 |
| 21 | LAHNER E, 2019, DIGEST LIVER DIS | 10.1016/j.dld.2019.09.016 | 108 | 15.43 | 4.35 |
| 22 | SMYK DS, 2014, WORLD J GASTROENTERO | 10.3748/wjg.v20.i3.613 | 107 | 8.92 | 3.67 |
| 23 | COATI I, 2015, WORLD J GASTROENTERO | 10.3748/wjg.v21.i42.12179 | 106 | 9.64 | 3.04 |
| 24 | RAPPEL S, 1995, DIGESTION | 10.1159/000201276 | 104 | 3.35 | 1.44 |
| 25 | WIRTH HP, 1997, GASTROENTEROLOGY | 10.1053/gast.1997.v113.pm9322503 | 102 | 3.52 | 1.71 |
| 26 | DE BLOCK CEM, 1999, J CLIN ENDOCR METAB | 10.1210/jc.84.11.4062 | 96 | 3.56 | 3.21 |
| 27 | TU SP, 2011, CANCER RES | 10.1158/0008-5472.CAN-10-4009 | 91 | 6.07 | 3.12 |
| 28 | FALLER G, 1996, VIRCHOWS ARCH |  | 90 | 3 | 0.94 |
| 29 | PERACCHI M, 2005, EUR J ENDOCRINOL | 10.1530/eje.1.01862 | 89 | 4.24 | 1.78 |
| 30 | ANNIBALE B, 1997, HELICOBACTER | 10.1111/j.1523-5378.1997.tb00060.x | 88 | 3.03 | 1.48 |
| 31 | MEMEO L, 2005, MODERN PATHOL | 10.1038/modpathol.3800404 | 83 | 3.95 | 1.66 |
| 32 | LAHNER E, 2008, AM J MED | 10.1016/j.amjmed.2007.09.025 | 82 | 4.56 | 2.36 |
| 33 | KAPADIA CR, 2003, J CLIN GASTROENTEROL | 10.1097/00004836-200305001-00006 | 79 | 3.43 | 1.19 |
| 34 | KAPADIA CR, 2003, J CLIN GASTROENTEROL-a | 10.1097/00004836-200305001-00006 | 79 | 3.43 | 1.19 |
| 35 | DE VITA S, 2000, HEPATOLOGY | 10.1002/hep.510310127 | 79 | 3.04 | 2.27 |
| 36 | MA JY, 1994, SCAND J GASTROENTERO | 10.3109/00365529409094870 | 76 | 2.38 | 1.24 |
| 37 | PAPAMICHAEL K, 2014, WORLD J GASTROENTERO | 10.3748/wjg.v20.i21.6374 | 75 | 6.25 | 2.57 |
| 38 | MEINING A, 2001, BEST PRACT RES CL GA | 10.1053/bega.2001.0253 | 74 | 2.96 | 1.26 |
| 39 | GO MF, 1997, GASTROENTEROLOGY | 10.1016/S0016-5085(97)80005-4 | 73 | 2.52 | 1.23 |
| 40 | ZUCCA E, 2014, CLIN CANCER RES | 10.1158/1078-0432.CCR-14-0496 | 73 | 6.08 | 2.5 |
| 41 | SIDEBOTHAM RL, 1991, J CLIN PATHOL | 10.1136/jcp.44.1.52 | 71 | 2.03 | 1.7 |
| 42 | DIXON MF, 2001, GUT | 10.1136/gut.49.1.2 | 71 | 2.84 | 1.21 |
| 43 | ENGLER DB, 2015, INFLAMM BOWEL DIS | 10.1097/MIB.0000000000000318 | 70 | 6.36 | 2 |
| 44 | FIGURA N, 1999, J PHYSIOL PHARMACOL |  | 69 | 2.56 | 2.31 |
| 45 | CHECCHI S, 2008, J CLIN ENDOCR METAB | 10.1210/jc.2007-1544 | 69 | 3.83 | 1.98 |
| 46 | RUGGE M, 2012, ALIMENT PHARM THER | 10.1111/j.1365-2036.2012.05101.x | 68 | 4.86 | 1.64 |
| 47 | STOLTE M, 1992, Z GASTROENTEROL |  | 68 | 2 | 1.41 |
| 48 | LIUTU M, 1998, INT J DERMATOL | 10.1046/j.1365-4362.1998.00328.x | 68 | 2.43 | 1.27 |
| 49 | DIRSCHMID K, 2006, VIRCHOWS ARCH | 10.1007/s00428-005-0068-2 | 68 | 3.4 | 1.24 |
| 50 | ZHANG Y, 2013, CANCER EPIDEM BIOMAR | 10.1158/1055-9965.EPI-12-1343 | 67 | 5.15 | 3.23 |

**Table S5 Keyword Clusters in Autoimmune Gastritis and *H. pylori* Research.**

| **Cluster colour** | **No. of keywords** | **Keywords** |
| --- | --- | --- |
| Cluster 1  (Red) | 38 | activation, adenocarcinoma, apoptosis, autoimmune gastritis, b-cell lymphoma, caga, campylobacter-pylori, cancer, carcinogenesis, carcinoid-tumors, cells, colonization, disease, epithelial-cells, expression, gastric-cancer, helicobacter-pylori, helicobacter-pylori eradication, immune-response, increased risk, infection, inflammation, inflammatory-bowel-disease, lymphocytes, lymphocytic gastritis, metaanalysis, metaplasia, mice, model, mouse model, omeprazole, parietal-cells, protein, receptor, regulatory t-cells, responses, stomach |
| Cluster 2  (Green) | 23 | antibodies, antigastric autoantibodies, antigens, autoantigen, beta-subunit, blood-group antigens, chronic atrophic gastritis, duodenal-ulcer, epidemiology, eradication, gastritis, h+ k+-adenosine triphosphatase, h+/k+-atpase, helicobacter-pylori genome, identification, lymphoma, mimicry, mucosa, pathogenesis, pernicious-anemia, proton pump, sydney system, tissue |
| Cluster 3  (Blue) | 18 | absorption, adolescents, anemia, atrophic body gastritis, atrophic gastritis, autoantibodies, body gastritis, celiac-disease, children, gastrointestinal-tract, high prevalence, iron-deficiency, iron-deficiency anemia, mellitus, molecular mimicry, parietal-cell antibodies, progression, serum ferritin |
| Cluster 4 (Yellow) | 16 | acid-secretion, age, association, cobalamin deficiency, deficiency, diseases, dyspepsia, follow-up, helicobacter-pylori infection, intestinal metaplasia, intrinsic-factor, manifestations, population, prevalence, therapy, ulcer |  | antibodies, antigen, berghei, binding, cells, circumsporozoite protein, expression, falciparum circumsporozoite protein, gene, gliding motility, heparan-sulfate, heparan-sulfate proteoglycan, in-vitro, infection, invasion, malaria infection, malaria parasite, monoclonal-antibody, mosquito, parasite, phase-3 trial, rts,s/as01 malaria vaccine, sporozoite, sporozoites, strain, surface-antigen, t-cell, vaccine |
| Cluster 5  (Purple) | 12 | carcinoma, classification, diagnosis, dysplasia, features, hypergastrinemia, lesions, management, pathology, risk, thyroid-disease, tumors |

**Supplementary References**

1. Appelmelk BJ, Simoons-Smit I, Negrini R, et al. Potential role of molecular mimicry between Helicobacter pylori lipopolysaccharide and host Lewis blood group antigens in autoimmunity. *Infection and immunity*. 1996;64(6):2031-2040.

2. Oertli M, Sundquist M, Hitzler I, et al. DC-derived IL-18 drives Treg differentiation, murine Helicobacter pylori–specific immune tolerance, and asthma protection. *The Journal of clinical investigation*. 2012;122(3):1082-1096.

3. Daniels JA, Lederman HM, Maitra A, Montgomery EA. Gastrointestinal tract pathology in patients with common variable immunodeficiency (CVID): a clinicopathologic study and review. *The American journal of surgical pathology*. 2007;31(12):1800-1812.

4. Rad R, Brenner L, Bauer S, et al. CD25+/Foxp3+ T cells regulate gastric inflammation and Helicobacter pylori colonization in vivo. *Gastroenterology*. 2006;131(2):525-537.

5. Amedei A, Bergman MP, Appelmelk BJ, et al. Molecular mimicry between Helicobacter pylori antigens and H+, K+–adenosine triphosphatase in human gastric autoimmunity. *The Journal of experimental medicine*. 2003;198(8):1147-1156.

6. Claeys D, Faller G, Appelmelk BJ, Negrini R, Kirchner T. The gastric H+, K+-ATPase is a major autoantigen in chronic Helicobacter pylori gastritis with body mucosa atrophy. *Gastroenterology*. 1998;115(2):340-347.

7. Malamut G, Verkarre V, Suarez F, et al. The enteropathy associated with common variable immunodeficiency: the delineated frontiers with celiac disease. *Official journal of the American College of Gastroenterology| ACG*. 2010;105(10):2262-2275.

8. Väänänen H, Vauhkonen M, Helske T, et al. Non-endoscopic diagnosis of atrophic gastritis with a blood test. Correlation between gastric histology and serum levels of gastrin-17 and pepsinogen I: a multicentre study. *European journal of gastroenterology & hepatology*. 2003;15(8):885-891.

9. Hershko C, Ronson A, Souroujon M, Maschler I, Heyd J, Patz J. Variable hematologic presentation of autoimmune gastritis: age-related progression from iron deficiency to cobalamin depletion. *Blood*. 2006;107(4):1673-1679.

10. Lenti MV, Rugge M, Lahner E, et al. Autoimmune gastritis. *Nature Reviews Disease Primers*. 2020;6(1):56.

11. Anderson WF, Rabkin CS, Turner N, Fraumeni Jr JF, Rosenberg PS, Camargo MC. The changing face of noncardia gastric cancer incidence among US non-Hispanic whites. *JNCI: Journal of the National Cancer Institute*. 2018;110(6):608-615.

12. Raghavan S, Fredriksson M, Svennerholm A, Holmgren J, Suri-Payer E. Absence of CD4+ CD25+ regulatory T cells is associated with a loss of regulation leading to increased pathology in Helicobacter pylori-infected mice. *Clinical & Experimental Immunology*. 2003;132(3):393-400.

13. Greiner A, Marx A, Heesemann J, Leebmann J, Schmausser B, Müller-Hermelink HK. Idiotype identity in a MALT-type lymphoma and B cells in Helicobacter pylori associated chronic gastritis. *Lab Invest*. 1994;70(4):572-578.

14. Parsons BN, Ijaz UZ, D’Amore R, et al. Comparison of the human gastric microbiota in hypochlorhydric states arising as a result of Helicobacter pylori-induced atrophic gastritis, autoimmune atrophic gastritis and proton pump inhibitor use. *PLoS pathogens*. 2017;13(11):e1006653.

15. Abraham SC, Singh VK, Yardley JH, Wu T-T. Hyperplastic polyps of the stomach: associations with histologic patterns of gastritis and gastric atrophy. *The American journal of surgical pathology*. 2001;25(4):500-507.

16. Hershko C, Hoffbrand AV, Keret D, et al. Role of autoimmune gastritis, Helicobacter pylori and celiac disease in refractory or unexplained iron deficiency anemia. *haematologica*. 2005;90(5):585-595.

17. D'elios MM, Bergman MP, Azzurri A, et al. H+, K+-ATPase (proton pump) is the target autoantigen of Th1-type cytotoxic T cells in autoimmune gastritis. *Gastroenterology*. 2001;120(2):377-386.

18. Lahner E, Norman GL, Severi C, et al. Reassessment of intrinsic factor and parietal cell autoantibodies in atrophic gastritis with respect to cobalamin deficiency. *Official journal of the American College of Gastroenterology| ACG*. 2009;104(8):2071-2079.

19. Rogers AB, Taylor NS, Whary MT, Stefanich ED, Wang TC, Fox JG. Helicobacter pylori but not high salt induces gastric intraepithelial neoplasia in B6129 mice. *Cancer research*. 2005;65(23):10709-10715.

20. Appelmelk BJ, Faller G, Claeys D, Kirchner T, Vandenbroucke-Grauls CM. Bugs on trial: the case of Helicobacter pylori and autoimmunity. *Immunology today*. 1998;19(7):296-299.

21. Lahner E, Zagari RM, Zullo A, et al. Chronic atrophic gastritis: Natural history, diagnosis and therapeutic management. A position paper by the Italian Society of Hospital Gastroenterologists and Digestive Endoscopists [AIGO], the Italian Society of Digestive Endoscopy [SIED], the Italian Society of Gastroenterology [SIGE], and the Italian Society of Internal Medicine [SIMI]. *Digestive and Liver Disease*. 2019;51(12):1621-1632.

22. Smyk DS, Koutsoumpas AL, Mytilinaiou MG, Rigopoulou EI, Sakkas LI, Bogdanos DP. Helicobacter pylori and autoimmune disease: cause or bystander. *World journal of gastroenterology: WJG*. 2014;20(3):613.

23. Coati I, Fassan M, Farinati F, Graham DY, Genta RM, Rugge M. Autoimmune gastritis: Pathologist’s viewpoint. *World journal of gastroenterology*. 2015;21(42):12179.

24. Rappel S, Altendorf-Hofmann A, Stolte M. Prognosis of gastric carcinoid tumours. *Digestion*. 1995;56(6):455-462.

25. Wirth HP, Yang M, Peek Jr RM, Tham K, Blaser MJ. Helicobacter pylori Lewis expression is related to the host Lewis phenotype. *Gastroenterology*. 1997;113(4):1091-1098.

26. De Block CE, De Leeuw IH, Van Gaal LF. High prevalence of manifestations of gastric autoimmunity in parietal cell antibody-positive type 1 (insulin-dependent) diabetic patients. The Belgian Diabetes Registry. *J Clin Endocrinol Metab*. 1999;84(11):4062-4067.

27. Tu SP, Quante M, Bhagat G, et al. IFN-γ inhibits gastric carcinogenesis by inducing epithelial cell autophagy and T-cell apoptosis. *Cancer Res*. 2011;71(12):4247-4259.

28. Faller G, Steininger H, Eck M, Hensen J, Hann EG, Kirchner T. Antigastric autoantibodies in Helicobacter pylori gastritis: prevalence, in-situ binding sites and clues for clinical relevance. *Virchows Arch*. 1996;427(5):483-486.

29. Peracchi M, Gebbia C, Basilisco G, et al. Plasma chromogranin A in patients with autoimmune chronic atrophic gastritis, enterochromaffin-like cell lesions and gastric carcinoids. *Eur J Endocrinol*. 2005;152(3):443-448.

30. Annibale B, Marignani M, Azzoni C, et al. Atrophic body gastritis: distinct features associated with Helicobacter pylori infection. *Helicobacter*. 1997;2(2):57-64.

31. Memeo L, Jhang J, Hibshoosh H, Green PH, Rotterdam H, Bhagat G. Duodenal intraepithelial lymphocytosis with normal villous architecture: common occurrence in H. pylori gastritis. *Mod Pathol*. 2005;18(8):1134-1144.

32. Lahner E, Centanni M, Agnello G, et al. Occurrence and risk factors for autoimmune thyroid disease in patients with atrophic body gastritis. *Am J Med*. 2008;121(2):136-141.

33. Kapadia CR. Gastric atrophy, metaplasia, and dysplasia: a clinical perspective. *J Clin Gastroenterol*. 2003;36(5 Suppl):S29-36; discussion S61-22.

34. Kapadia CR. Gastric atrophy, metaplasia, and dysplasia: a clinical perspective. *J Clin Gastroenterol-a*. 2003;36(5 Suppl):S29-36; discussion S61-22.

35. De Vita S, De Re V, Sansonno D, et al. Gastric mucosa as an additional extrahepatic localization of hepatitis C virus: viral detection in gastric low-grade lymphoma associated with autoimmune disease and in chronic gastritis. *Hepatology*. 2000;31(1):182-189.

36. Ma JY, Borch K, Sjöstrand SE, Janzon L, Mårdh S. Positive correlation between H,K-adenosine triphosphatase autoantibodies and Helicobacter pylori antibodies in patients with pernicious anemia. *Scand J Gastroenterol*. 1994;29(11):961-965.

37. Papamichael K, Konstantopoulos P, Mantzaris GJ. Helicobacter pylori infection and inflammatory bowel disease: is there a link? *World J Gastroenterol*. 2014;20(21):6374-6385.

38. Meining A, Morgner A, Miehlke S, Bayerdörffer E, Stolte M. Atrophy-metaplasia-dysplasia-carcinoma sequence in the stomach: a reality or merely an hypothesis? *Best Pract Res Clin Gastroenterol*. 2001;15(6):983-998.

39. Go MF. What are the host factors that place an individual at risk for Helicobacter pylori-associated disease? *Gastroenterology*. 1997;113(6 Suppl):S15-20.

40. Zucca E, Bertoni F, Vannata B, Cavalli F. Emerging role of infectious etiologies in the pathogenesis of marginal zone B-cell lymphomas. *Clin Cancer Res*. 2014;20(20):5207-5216.

41. Sidebotham RL, Batten JJ, Karim QN, Spencer J, Baron JH. Breakdown of gastric mucus in presence of Helicobacter pylori. *J Clin Pathol*. 1991;44(1):52-57.

42. Dixon MF. Prospects for intervention in gastric carcinogenesis: reversibility of gastric atrophy and intestinal metaplasia. *Gut*. 2001;49(1):2-4.

43. Engler DB, Leonardi I, Hartung ML, et al. Helicobacter pylori-specific protection against inflammatory bowel disease requires the NLRP3 inflammasome and IL-18. *Inflamm Bowel Dis*. 2015;21(4):854-861.

44. Figura N, Di Cairano G, Lorè F, et al. The infection by Helicobacter pylori strains expressing CagA is highly prevalent in women with autoimmune thyroid disorders. *J Physiol Pharmacol*. 1999;50(5):817-826.

45. Checchi S, Montanaro A, Pasqui L, et al. L-thyroxine requirement in patients with autoimmune hypothyroidism and parietal cell antibodies. *J Clin Endocrinol Metab*. 2008;93(2):465-469.

46. Rugge M, Fassan M, Pizzi M, et al. Autoimmune gastritis: histology phenotype and OLGA staging. *Aliment Pharmacol Ther*. 2012;35(12):1460-1466.

47. Stolte M, Eidt S. Chronic erosions of the antral mucosa: a sequela of Helicobacter pylori-induced gastritis. *Z Gastroenterol*. 1992;30(12):846-850.

48. Liutu M, Kalimo K, Uksila J, Kalimo H. Etiologic aspects of chronic urticaria. *Int J Dermatol*. 1998;37(7):515-519.

49. Dirschmid K, Platz-Baudin C, Stolte M. Why is the hyperplastic polyp a marker for the precancerous condition of the gastric mucosa? *Virchows Arch*. 2006;448(1):80-84.

50. Zhang Y, Weck MN, Schöttker B, Rothenbacher D, Brenner H. Gastric parietal cell antibodies, Helicobacter pylori infection, and chronic atrophic gastritis: evidence from a large population-based study in Germany. *Cancer Epidemiol Biomarkers Prev*. 2013;22(5):821-826.
